# Supplementary material for: Isolation and Characterization of the Zearalenone-Degrading Strain, Bacillus spizizenii B73, Inspired by Esterase Activity
Source: MDPI journal article supplement (doi:10.3390/toxins15080488), 2023-08-02
Supplement: s1 [file s1]

# Supplementary materials:

## Isolation and Characterization of the Zearalenone-Degrading Strain, *Bacillus spizizenii* B73, Inspired by Esterase Activity

Xue Liu<sup>1,†</sup>, Na Wu<sup>2,†</sup>, Mingyu Zhang<sup>1</sup>, Feng Xue<sup>1,\*</sup> and Qing Xu<sup>1,\*</sup>

<sup>1</sup> School of Food Science and Pharmaceutical Engineering, Nanjing Normal University, Nanjing 210046, China; liuxue@nnu.edu.cn (X.L.); mingyu@nnu.edu.cn (M.Z.)

<sup>2</sup> College of Marine and Bioengineering, Yancheng Institute of Technology, Yancheng 224007, China; nwu@cibt.ac.cn

\* Correspondence: xuef2020@nnu.edu.cn (F.X.); xu\_qing@nnu.edu.cn (Q.X.)

† These authors contributed equally to this work.

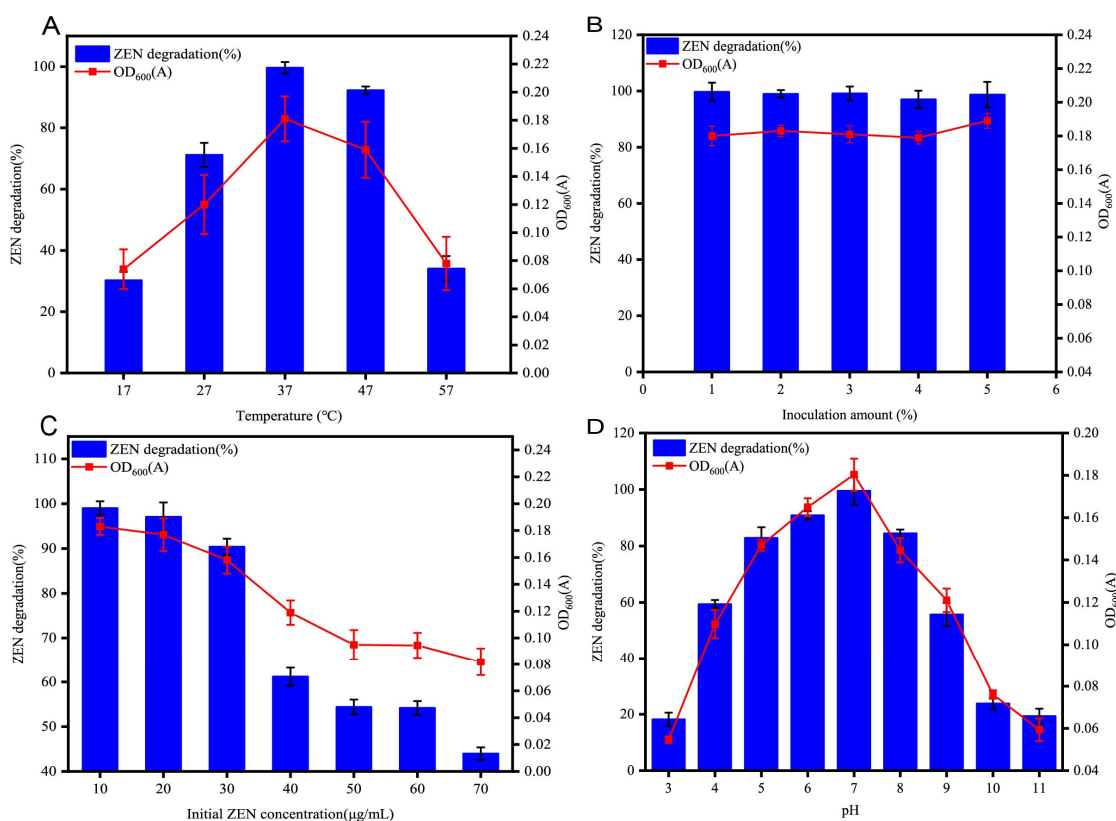

**Figure S1.** Effect of medium conditions on degradation of ZEN by B73 strain: (A) temperature, (B) inoculation amount, (C) initial ZEN concentration, and (D) pH.
